# Supplementary material
Source: ML conference proceedings conference paper supplement (https://www.ecva.net/papers/eccv_2020/papers_ECCV/html/123480171_ECCV_2020_paper.php)
Supplement: Supplementary file 1 [file 123480171-supp.zip]

## A Proofs

*proof of Lemma 3.* Note that the expected form of Eq. (5) is the right hand side of Eq. (3), since  $\{x_i^{[M]}\}_i$  are i.i.d from joint distribution  $U_{X^{[M]}}$ . Therefore, from Lemma 1, one can immediately get the conclusion.  $\square$

**Lemma 4.** *Given a joint distribution  $p(x^1, \dots, x^M, y)$ , where  $y$  is a discrete random variable, we can always find  $M$  independent random variables  $z^1, \dots, z^M$  such that  $z^i \perp\!\!\!\perp y$  and  $x^m = f_m(y, z^m)$ , for  $m \in [M]$ .*

*Proof.* This proof is a generalization of the Proposition in [1]. For  $z_1, \dots, z_M \stackrel{i.i.d}{\sim} \text{Uniform}(0, 1)$ , then from [1] we have  $x^m|y = F_{y,m}^{-1}(z_m)$  where  $F_{y,m}(t) = \mathbb{P}(x^m \leq t|y)$  where  $\mathbb{P}(x^m \leq t|y)$  is the cumulative distribution function of  $p(x^m|y)$ .  $\square$

**Lemma 5.** *Given assumption 1, then the Marginal-joint ratio (definition 1)  $R(x^1, \dots, x^M)$  has*

$$R(x^1, \dots, x^M) = \sum_{y \in \mathcal{C}} \frac{\Pi_m p(y|x^m)}{p(y)^{M-1}}$$

Further, the optimal  $g$  to make the equality holds in Lemma 1 has

$$g(x^1, \dots, x^M) = 1 + \log \sum_{y \in \mathcal{C}} \frac{\Pi_m p(y|x^m)}{p(y)^{M-1}}.$$

*Proof.*

$$\begin{aligned} R(x^1, \dots, x^M) &= \frac{p(x^1, \dots, x^M)}{\Pi_m p(x^m)} \\ &= \frac{\sum_y p(x^1, \dots, x^M, y)}{\Pi_m p(x^m)} \\ &= \frac{\sum_y p(x^1, \dots, x^M|y)p(y)}{\Pi_m p(x^m)} \\ &= \frac{\sum_y \pi_m p(x^1|y)p(y)}{\Pi_m p(x^m)} \\ &= \sum_y \frac{\pi_m p(y|x^m)}{p(y)^{M-1}} \end{aligned}$$

One can immediately gets the conclusion for  $g$  from Lemma 1.  $\square$

**Theorem 4 (Main theorem).** *Define the expected total correlation gain  $TCg(h^1, \dots, h^M, p)$  as*

$$TCg(h^1, \dots, h^M, p) = \mathbb{E}_{x_i^{[M]} \leftarrow \text{i.i.d. } U_{X^{[M]}}} \left( \mathcal{L}_{TC}(x_i^{[M]}; h^{[M]}, \mathbf{p}) \right)$$

*Given the conditional independence assumption 1 and well-defined prior assumption 2, we have that*

*Ground-truth  $\rightarrow$  Maximizer*  $(h_*^{[M]}, \mathbf{p}^*)$  is a maximizer of  $\max_{\forall m, h^m \in H^m, \mathbf{p} \in \Delta_{\mathcal{C}}} TCG(h^1, \dots, h^M, p)$ , in other words,  $\forall h^{[M]} \in H^{[M]}, \mathbf{p} \in \Delta_{\mathcal{C}}$ ,

$$TCG(h_*^1, \dots, h_*^M, p^*) \geq TCG(h^1, \dots, h^M, p^*)$$

*Maximizer  $\rightarrow$  (Permuted) Ground-truth* If the prior is well defined, then for any maximizer of  $TCG, (\tilde{h}^{[M]}, \tilde{\mathbf{p}})$ , there is a permutation  $\tilde{\pi} : \mathcal{C} \rightarrow \mathcal{C}$  such that:

$$\tilde{h}^m(x^m)_c = P(Y = \tilde{\pi}(c) | X^m = x^m), \tilde{\mathbf{p}}_c = P(Y = \tilde{\pi}(c))$$

*Proof.* We have

$$\begin{aligned} TCG(h^1, \dots, h^M, p) &= \mathbb{E}_{x^{[M]} \leftarrow U_{X^{[M]}}} (1 + \log \sum_{y \in \mathcal{C}} \frac{\Pi_m h_*^m(x^m)}{\mathbf{p}^*(y)^{M-1}}) \\ &\quad - \mathbb{E}_{x^{[M]} \leftarrow V_{X^{[M]}}} \sum_{y \in \mathcal{C}} \frac{\Pi_m h_*^m(x_i^m)}{\mathbf{p}^*(y)^{M-1}} \end{aligned} \quad (8)$$

*Ground-truth  $\rightarrow$  Maximizer* From definition 1, i.e.,

$$h_*^m(x^m)_c = P(Y = c | x^m), (p^*)_c = P(Y = c)$$

Inspired by Lemma 3 and 1, we have that the  $TCG(h_*^{[M]}, p^*)$  can achieve the maximum value, which equals to  $TC(X^1, \dots, x^M)$ .

*Maximizer  $\rightarrow$  (Permuted) Ground-truth* For any maximizer  $(\tilde{h}^{[M]}, \tilde{\mathbf{p}})$ , we have from Lemma 3 that

$$\mathcal{R}(\tilde{h}^{[M]}, \tilde{\mathbf{p}}) = 1 + \text{PTC}(x^1, \dots, x^M),$$

which means that the  $(\tilde{h}^{[M]}, \tilde{\mathbf{p}})$  satisfies Eq. (4). With assumption 2, we have that there exists a permutation  $\tilde{\pi} : \mathcal{C} \rightarrow \mathcal{C}$  such that

$$\tilde{h}^m(x^m)_c = P(Y = \tilde{\pi}(c) | X^m = x^m), \tilde{\mathbf{p}}_c = P(Y = \tilde{\pi}(c)).$$

□

## B Algorithm

We show the pipeline of TCGM in Alg 1.

*Time Complexity* The overall loss function of our TCGM method is composed of  $\mathcal{L}_{\text{CE}}$  which is  $\mathcal{O}(M)$  since it is repeatedly implemented for  $M$  classifiers and  $\mathcal{L}_{\text{TC}}^{(B)}$ , as the addition of two terms, namely the term (a)  $(\frac{1}{N} \sum_i \log \sum_{c \in \mathcal{C}} \frac{\Pi_m h^m(x_i^m)_c}{(p_c)^{M-1}})$  and the term (b)  $(\frac{1}{N!/(N-M)!} \sum_{i_1 \neq i_2 \neq \dots \neq i_M} \sum_{c \in \mathcal{C}} \frac{\Pi_m h^m(x_{i_m}^m)_c}{(p_c)^{M-1}})$  in Eq. (6). The term (a) with  $N$  samples generated from joint distribution  $p(x^1, \dots, x^M)$  for each modality; hence, the optimization of the term (a) is  $\mathcal{O}(M)$ . For term (b) with  $N!/(N-M)!$  samples generated from marginal distribution  $\Pi_m p(x^m)$ , it is the sum of  $N$  terms by grouping terms with  $h^m(x_i^m)$  for each  $i \in [N]$  with  $h^m(x_1^m), \dots, h^m(x_N^m)$  form  $[M]$  calculated ahead (which is  $\mathcal{O}(M)$ ), hence is linear scale with respect to  $M$ . Therefore, the time complexity for our loss function is  $\mathcal{O}(M)$ .

**Algorithm 1** TCGM Optimization

---

**Require:** Unlabeled dataset  $\mathcal{D}_u = \{x_i^{[M]}\}_i$ , labeled dataset  $\mathcal{D}_l = \{(x_i^{[M]}, y_i)\}_i$ ,  $M$  classifiers  $\{h^m(\cdot; \Theta^m)\}_{m=1}^M$ , epoch number  $T$ , learning rate  $\gamma_u, \gamma_l$ , batch size  $N$  and hyperparameter  $\mathbf{p}$ .

**for** epoch  $t = 1 \rightarrow T$  **do**

**for**  $m = 1 \rightarrow M$  **do**

**for** batch  $b = 1 \rightarrow \lceil |\mathcal{D}_l|/B \rceil$  **do**

            Randomly sample a batch of samples:

$\mathcal{B}_l = \{(x_i^{[M]}, y_i)\}_{i=1}^B$  from  $\mathcal{D}_l$

            Compute the  $\mathcal{L}_{\text{CE}}$  loss:

$L \leftarrow \mathcal{L}_{\text{CE}}(\mathcal{B}_l; h^m(\cdot; \Theta^m))$

            Update  $\Theta^m$ :  $\Theta^m \leftarrow \Theta^m - \gamma_l \frac{\partial L}{\partial \Theta^m}$

**end for**

**end for**

**for** batch  $b = 1 \rightarrow \lceil (|\mathcal{D}_u| + |\mathcal{D}_l|)/B \rceil$  **do**

        Randomly sample a batch of samples:

$\mathcal{B}_{u \cup l} = \{x_i^{[M]}\}_{i=1}^B$  from  $\mathcal{D}_u \cup \mathcal{D}_l$

        Compute the  $\mathcal{L}_{\text{TC}}$  loss:

$L \leftarrow \mathcal{L}_{\text{TC}}(\mathcal{B}_{u \cup l}; \{h^m(\cdot; \Theta^m)\}_{m=1}^M, \mathbf{p})$

        Update  $\Theta^{[M]}$ :  $\forall m, \Theta^m \leftarrow \Theta^m - \gamma_u \frac{\partial L}{\partial \Theta^m}$

**end for**

**end for**

---

**C Extended experiments results**

We show the complete result of single modality classifiers on Emotion Recognition task in Figure 6.

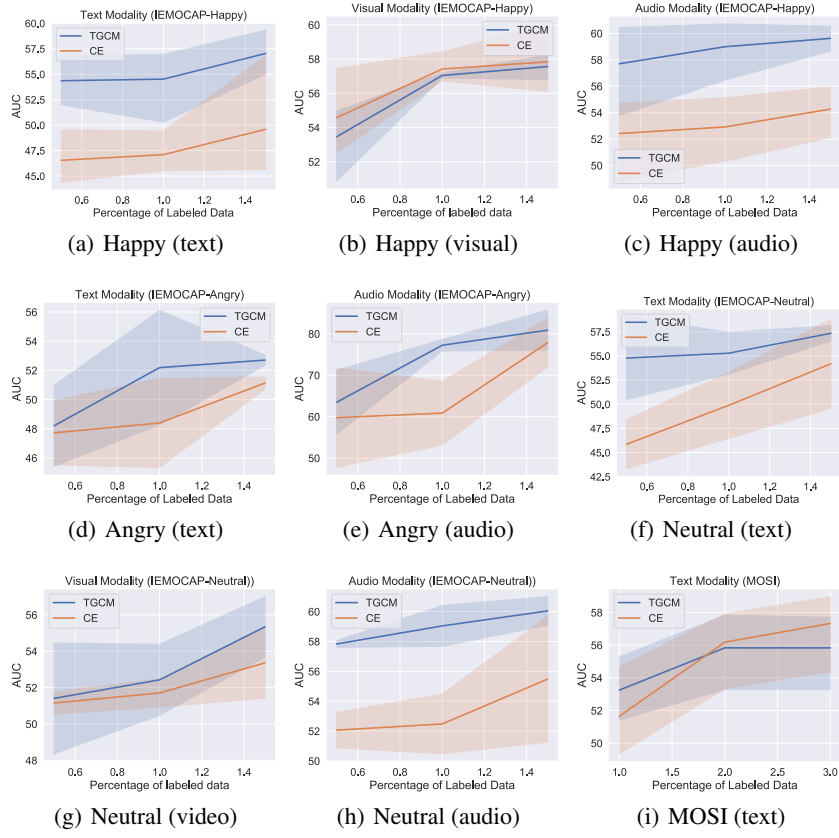

**Fig. 8.** AUC of single modality classifiers by CE and TCGM.
